# Supplementary material
Source: ML conference proceedings conference paper supplement (https://openreview.net/forum?id=e0nZIFEpmYh)
Supplement: supplementary_material [file attachment]

---

# Supplementary Materials of Paper 5239

---

Anonymous Author(s)

Affiliation

Address

email

## 1 Broader Impact

Vision-Language Pre-training (VLP) serves for a lot of downstream vision-language tasks like visual question answering, visual reasoning, visual entailment. By extensive experiments, we show the importance of inter-modality interaction and achieve competitive performance by applying Transformer for visual embedding. Our study can benefit future researches from providing a view of designing model for VLP. By revealing the fusion mechanism of multi-modality, our work may also benefit other multi-modal tasks besides vision-language task.

At the same time, Vision-Language Pre-training may learn biased or offensive content from unsupervised image-text pairs. This may cause improper understanding of images. More work is needed to automatically filter data for pre-training.

## 2 Image-Text Retrieval

In this paper we focus on tasks related to visual relation understanding and inter-modal reasoning: Visual Question Answering (VQA), natural language for visual reasoning (NLVR), and fine-grained visual reasoning (Visual Entailment). We also show results on Image-Text Retrieval task. Image-text retrieval aims to retrieve the most relevant text from candidate images, or vice versa. Image-text retrieval includes two sub-tasks of image-to-text retrieval (TR) and text-to-image retrieval (IR). We follow the same practice as SOHO [4] to conduct image-text retrieval for fair comparisons. During training, we construct image-text pairs in a mini-batch by sampling aligned pairs from ground-truth annotations, and unaligned pairs from other captions within the mini-batch. To predict whether an image-text pair is aligned or not, we use the joint embedding representation of the [CLS] token from Transformers to perform binary classification. Since the binary classification objective of image-text retrieval model is consistent with the image-text matching (ITM) task in pre-training stage, we initialize the task-specific head from the pre-trained ITM head for better initialization. We adopt AdamW optimizer with a learning rate of  $5e-5$ . The mini-batch size is set to 32. We train 10 epochs until convergence and decay the learning rate by half at 5th epoch empirically.

Experiment results on Flickr30k [12] are shown in Table 1. Our model outperforms ViLT and SOHO under all metrics on Flickr30k. The promising results of our model on image-text retrieval indicate the advantage of our fully Transformer architecture for learning cross-modal alignment.

## 3 Dataset Statistics

We summarize the statistics of all our pre-training and downstream tasks in Table 2.

## References

- [1] Yen-Chun Chen, Linjie Li, Licheng Yu, Ahmed El Kholy, Faisal Ahmed, Zhe Gan, Yu Cheng, and Jingjing Liu. Uniter: Universal image-text representation learning. In *European Conference*

Table 1: Evaluation of image-to-text retrieval (TR) and text-to-image retrieval (IR) on Flickr30K dataset. "-" indicates the detail is not reported.

| Method  | VSE++[2] | SCAN[8] | ViLBERT[11] | Unicoder-VL[9] | UNITER[1] | ViLT[6] | SOHO[4] | Ours        |
|---------|----------|---------|-------------|----------------|-----------|---------|---------|-------------|
| TR R@1  | 52.9     | 67.4    | -           | 86.2           | 85.9      | 83.7    | 86.5    | <b>87.0</b> |
| TR R@5  | 80.5     | 90.3    | -           | 96.3           | 97.1      | 97.2    | 98.1    | <b>98.4</b> |
| TR R@10 | 87.2     | 95.8    | -           | 99.0           | 98.8      | 98.1    | 99.3    | <b>99.5</b> |
| IR R@1  | 39.6     | 48.6    | 58.2        | 71.5           | 72.5      | 62.2    | 72.5    | <b>73.5</b> |
| IR R@5  | 70.1     | 77.7    | 84.9        | 90.9           | 92.4      | 87.6    | 92.7    | <b>93.1</b> |
| IR R@10 | 79.5     | 85.2    | 91.5        | 94.9           | 96.1      | 93.2    | 96.1    | <b>96.4</b> |

Table 2: Statistics of different tasks. Notation "\*" denotes Karpathy split [5]. Notation "-" denotes not applicable.

| Task                      | Dataset                | Train Split    | Test Split        | Metric         |
|---------------------------|------------------------|----------------|-------------------|----------------|
| Pre-training              | VG [7]                 | train          | -                 | -              |
|                           | MSOCO [10]             | train+restval* | -                 | -              |
| Image-Text Retrieval      | Flickr30K [12]         | train          | test*             | Recall@1,5,10  |
| Visual Question Answering | VQA2.0 [3]             | train+val      | test-dev/test-std | VQA-score [3]  |
| Visual Reasoning          | NLVR <sup>2</sup> [13] | train          | dev/test-P        | Top-1 Accuracy |
| Visual Entailment         | SNLI-VE [14]           | train          | val/test          | Top-1 Accuracy |

34 *on Computer Vision*, pages 104–120. Springer, 2020.

35 [2] Fartash Faghri, David J Fleet, Jamie Ryan Kiros, and Sanja Fidler. Vse++: Improving visual-  
36 semantic embeddings with hard negatives. *arXiv preprint arXiv:1707.05612*, 2017.

37 [3] Yash Goyal, Tejas Khot, Douglas Summers-Stay, Dhruv Batra, and Devi Parikh. Making  
38 the v in vqa matter: Elevating the role of image understanding in visual question answering.  
39 In *Proceedings of the IEEE Conference on Computer Vision and Pattern Recognition*, pages  
40 6904–6913, 2017.

41 [4] Zhicheng Huang, Zhaoyang Zeng, Yupan Huang, Bei Liu, Dongmei Fu, and Jianlong Fu. Seeing  
42 out of the box: End-to-end pre-training for vision-language representation learning. *arXiv*  
43 *preprint arXiv:2104.03135*, 2021.

44 [5] Andrej Karpathy and Li Fei-Fei. Deep visual-semantic alignments for generating image  
45 descriptions. In *Proceedings of the IEEE conference on computer vision and pattern recognition*,  
46 pages 3128–3137, 2015.

47 [6] Wonjae Kim, Bokyung Son, and Ildoo Kim. Vilt: Vision-and-language transformer without  
48 convolution or region supervision. *arXiv preprint arXiv:2102.03334*, 2021.

49 [7] Ranjay Krishna, Yuke Zhu, Oliver Groth, Justin Johnson, Kenji Hata, Joshua Kravitz, Stephanie  
50 Chen, Yannis Kalantidis, Li-Jia Li, David A Shamma, et al. Visual genome: Connecting  
51 language and vision using crowdsourced dense image annotations. *International journal of*  
52 *computer vision*, 123(1):32–73, 2017.

53 [8] Kuang-Huei Lee, Xi Chen, Gang Hua, Houdong Hu, and Xiaodong He. Stacked cross attention  
54 for image-text matching. In *Proceedings of the European Conference on Computer Vision*  
55 *(ECCV)*, pages 201–216, 2018.

56 [9] Gen Li, Nan Duan, Yuejian Fang, Ming Gong, and Daxin Jiang. Unicoder-vl: A universal  
57 encoder for vision and language by cross-modal pre-training. In *Proceedings of the AAAI*  
58 *Conference on Artificial Intelligence*, volume 34, pages 11336–11344, 2020.

59 [10] Tsung-Yi Lin, Michael Maire, Serge Belongie, James Hays, Pietro Perona, Deva Ramanan, Piotr  
60 Dollár, and C Lawrence Zitnick. Microsoft coco: Common objects in context. In *European*  
61 *conference on computer vision*, pages 740–755. Springer, 2014.

62 [11] Jiasen Lu, Dhruv Batra, Devi Parikh, and Stefan Lee. Vilbert: Pretraining task-agnostic  
63 visiolinguistic representations for vision-and-language tasks. In *Proceedings of the 32nd*  
64 *International Conference on Neural Information Processing Systems*, 2019.

- 65 [12] Bryan A Plummer, Liwei Wang, Chris M Cervantes, Juan C Caicedo, Julia Hockenmaier, and  
66 Svetlana Lazebnik. Flickr30k entities: Collecting region-to-phrase correspondences for richer  
67 image-to-sentence models. In *Proceedings of the IEEE international conference on computer*  
68 *vision*, pages 2641–2649, 2015.
- 69 [13] Alane Suhr, Stephanie Zhou, Ally Zhang, Iris Zhang, Huajun Bai, and Yoav Artzi. A corpus  
70 for reasoning about natural language grounded in photographs. In *Proceedings of the Annual*  
71 *Meeting of the Association for Computational Linguistics*, 2019.
- 72 [14] Ning Xie, Farley Lai, Derek Doran, and Asim Kadav. Visual entailment task for visually-  
73 grounded language learning. *arXiv preprint arXiv:1811.10582*, 2018.
